# Supplementary material for: In Situ Molecular Ecological Analyses Illuminate Distinct Factors Regulating Formation and Demise of a Harmful Dinoflagellate Bloom
Source: PubMed Central journal article supplement (PMC10269597; doi:10.1128/spectrum.05157-22), 2023-04-19
Supplement: spectrum.05157-22-s0001.pdf [file spectrum.05157-22-s0001.pdf]

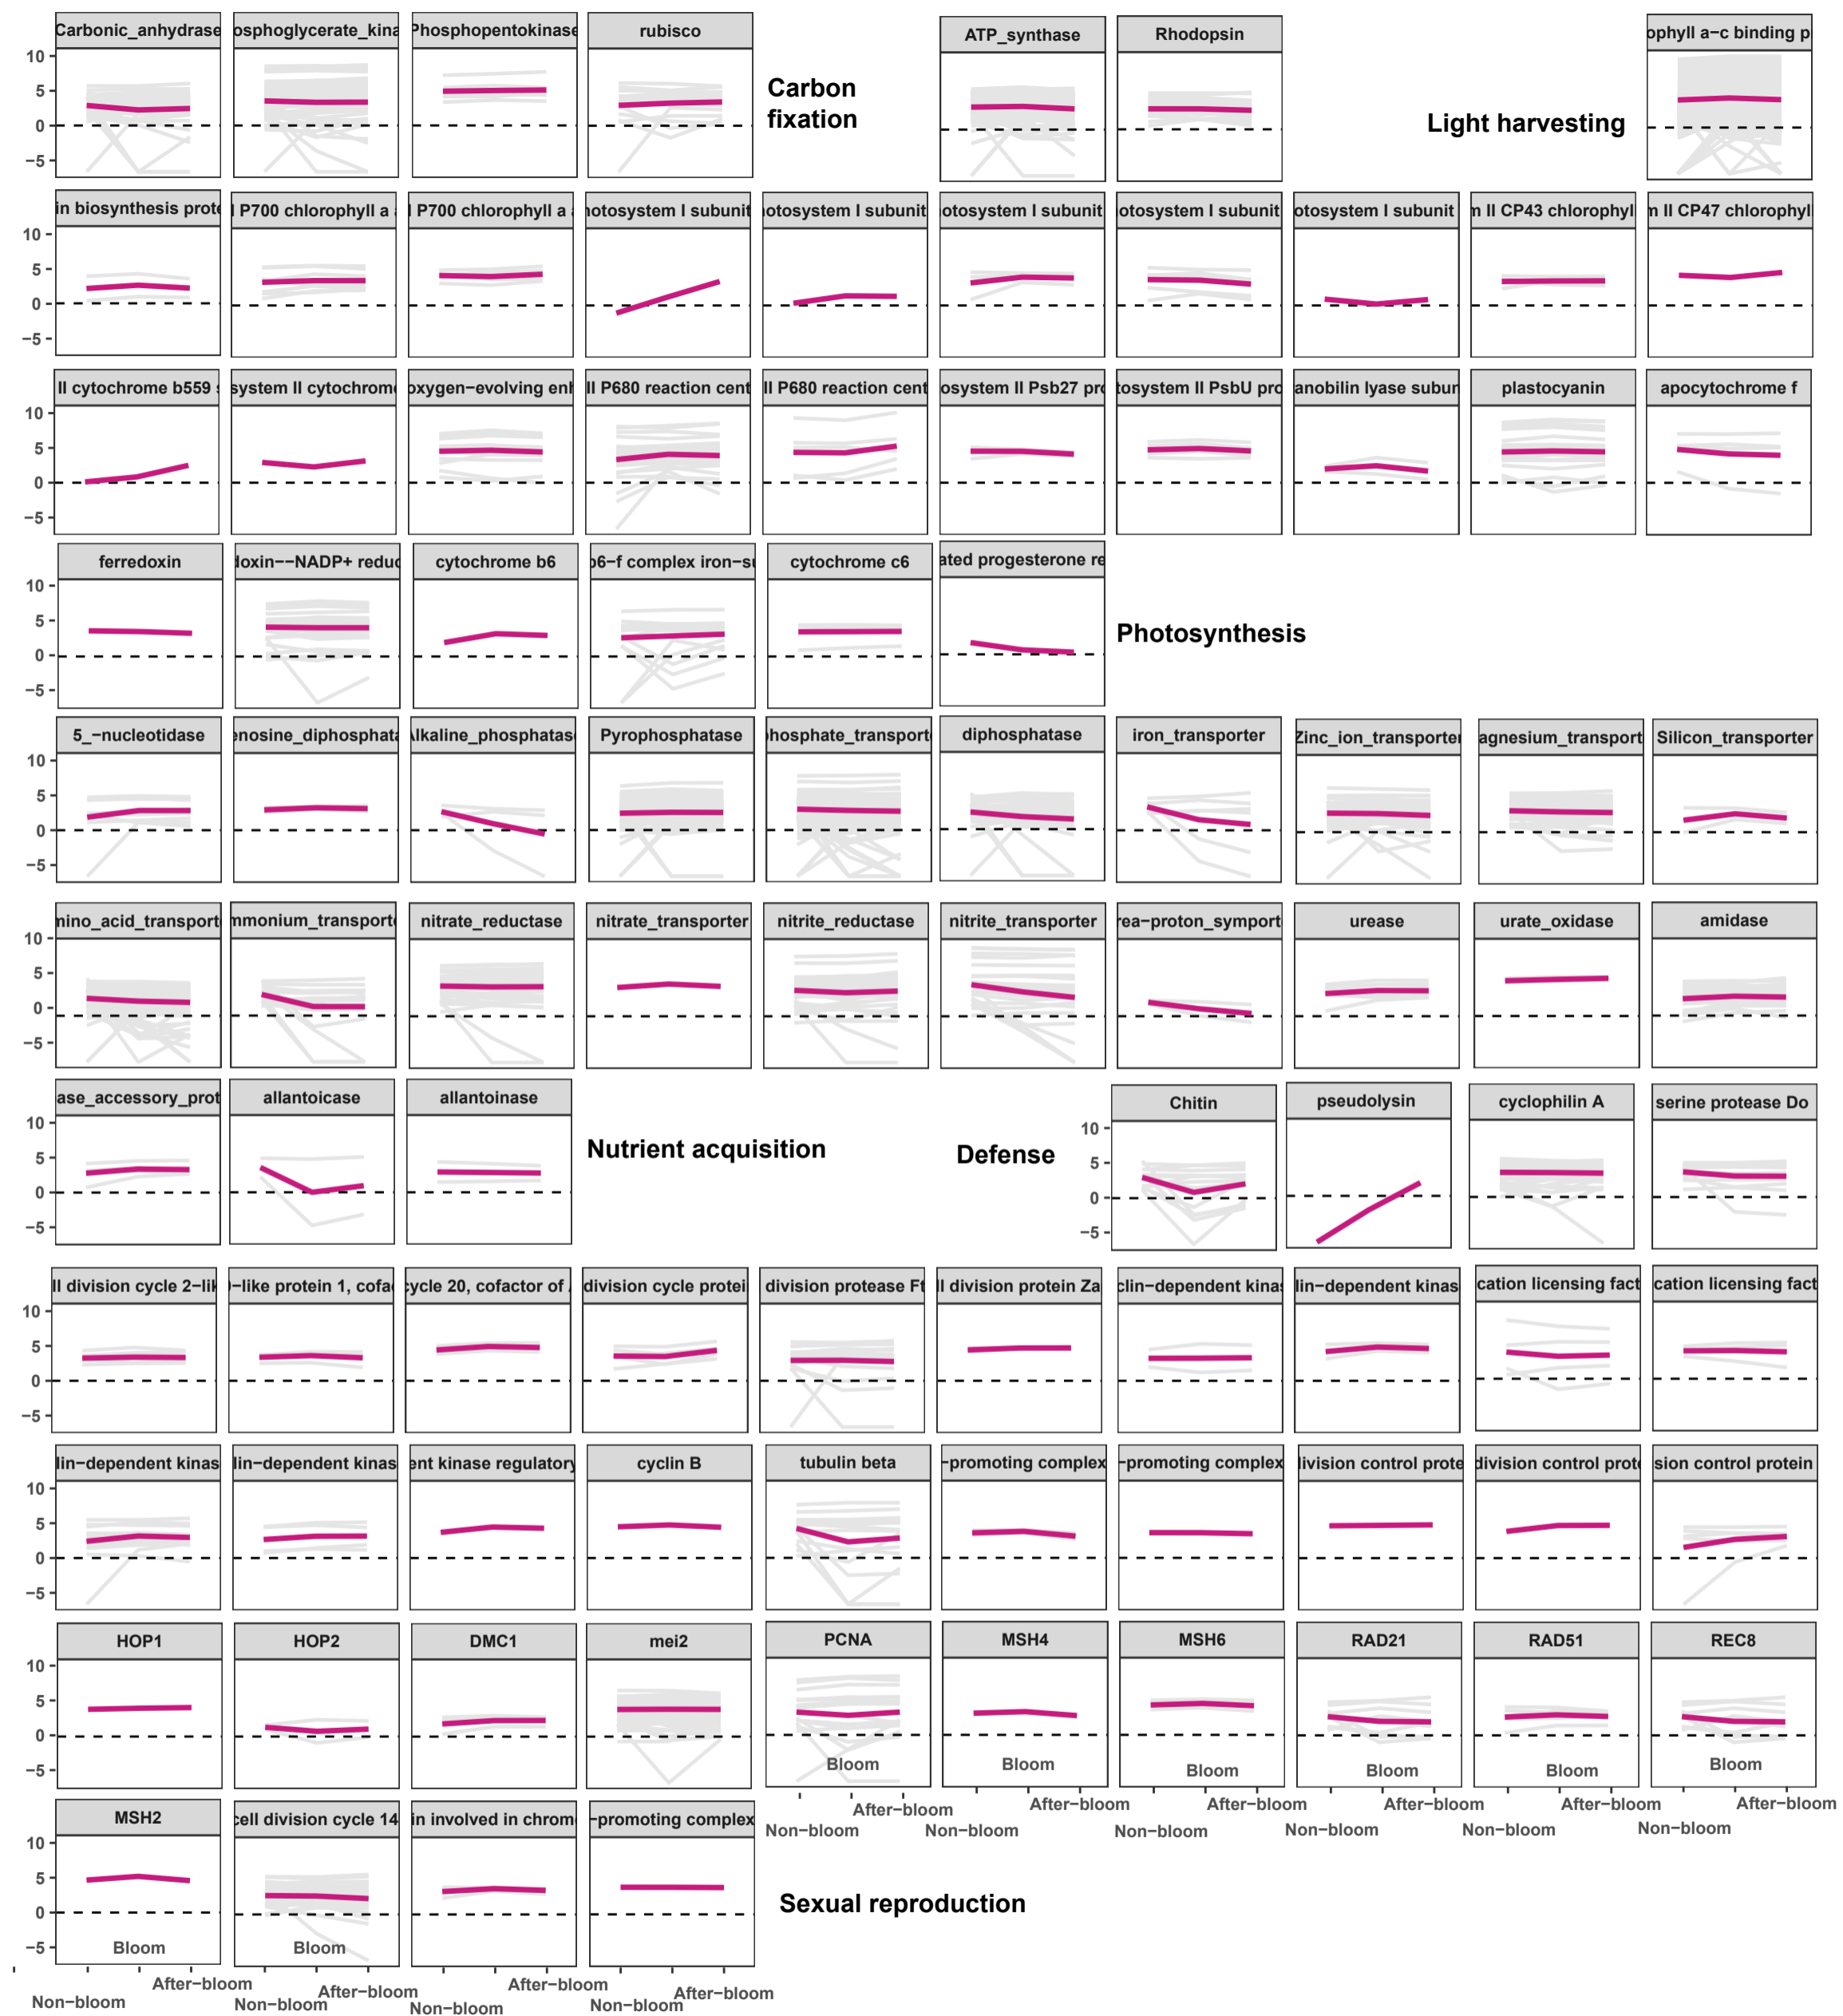

**Fig. S1.** Expression patterns of energy and nutrient acquisition, defense, and cell reproduction (ENDS) related genes in *Karenia* under the three bloom conditions (non-bloom, bloom and after-bloom).
